# Supplementary material for: CT-based Navigation System Using a Patient-Specific Instrument for Femoral Component Positioning: An Experimental in vitro Study with a Sawbone Model
Source: PubMed Central journal article supplement — Yonsei Med J. 2018 Jul 4;59(6):769–80. doi: 10.3349/ymj.2018.59.6.769 (PMC6037596; doi:10.3349/ymj.2018.59.6.769), 2018-07-04
Supplement: ymj-59-769-s002.pdf [file ymj-59-769-s002.pdf]

**Supplementary Table 1.** Data Set for Two-Dimensional Anteversion

| No. of trials | Planning value (°) | With surgical navigation |           | Without surgical navigation |           |
|---------------|--------------------|--------------------------|-----------|-----------------------------|-----------|
|               |                    | Measured value (°)       | Error (°) | Measured value (°)          | Error (°) |
|               |                    | A                        | B         | B-A                         | C         |
| 1             | 4.49               | 3.80                     | 0.69      | 3.96                        | 0.53      |
| 2             | 4.49               | 5.02                     | 0.53      | 5.17                        | 0.68      |
| 3             | 4.49               | 4.74                     | 0.25      | 14.61                       | 10.12     |
| 4             | 4.49               | 3.05                     | 1.44      | 6.24                        | 1.75      |
| 5             | 4.49               | 4.33                     | 0.16      | 1.95                        | 2.54      |
| 6             | 4.49               | 1.84                     | 2.65      | 2.30                        | 2.19      |
| 7             | 4.49               | 2.26                     | 2.23      | 0.98                        | 3.51      |
| 8             | 4.49               | 1.57                     | 2.92      | 11.08                       | 6.59      |
| 9             | 4.49               | 5.71                     | 1.22      | 18.16                       | 13.67     |
| 10            | 4.49               | 4.12                     | 0.37      | 3.16                        | 1.33      |
| 11            | 4.49               | 3.86                     | 0.63      | 7.32                        | 2.83      |
| 12            | 4.49               | 4.07                     | 0.42      | 0.39                        | 4.10      |
| 13            | 4.49               | 6.96                     | 2.47      | 9.65                        | 5.16      |
| 14            | 4.49               | 6.56                     | 2.07      | 10.01                       | 5.52      |
| 15            | 4.49               | 5.62                     | 1.13      | 9.74                        | 5.25      |
| 16            | 4.49               | 5.54                     | 1.05      | 6.49                        | 2.00      |
| 17            | 4.49               | 4.87                     | 0.38      | 6.53                        | 2.04      |
| 18            | 4.49               | 4.87                     | 0.38      | 20.32                       | 15.83     |
| 19            | 4.49               | 7.81                     | 3.32      | 10.58                       | 6.09      |
| 20            | 4.49               | 7.53                     | 3.04      | 5.47                        | 0.98      |
| 21            | 4.49               | 2.57                     | 1.92      | 7.59                        | 3.10      |
| 22            | 4.49               | 3.24                     | 1.25      | 12.31                       | 7.82      |
| 23            | 4.49               | 3.02                     | 1.47      | 4.87                        | 0.38      |
| 24            | 4.49               | 7.03                     | 2.54      | 18.23                       | 13.74     |
| 25            | 4.49               | 5.35                     | 0.86      | 0.74                        | 3.75      |
| 26            | 4.49               | 7.36                     | 2.87      | 10.24                       | 5.75      |
| 27            | 4.49               | 4.99                     | 0.50      | 2.57                        | 1.92      |
| 28            | 4.49               | 1.80                     | 2.69      | 7.40                        | 2.91      |
| 29            | 4.49               | 4.52                     | 0.03      | 6.50                        | 2.01      |
| 30            | 4.49               | 3.82                     | 0.67      | 13.65                       | 9.16      |
