# Supplementary material for: CT-based Navigation System Using a Patient-Specific Instrument for Femoral Component Positioning: An Experimental in vitro Study with a Sawbone Model
Source: PubMed Central journal article supplement — Yonsei Med J. 2018 Jul 4;59(6):769–80. doi: 10.3349/ymj.2018.59.6.769 (PMC6037596; doi:10.3349/ymj.2018.59.6.769), 2018-07-04
Supplement: ymj-59-769-s003.pdf [file ymj-59-769-s003.pdf]

**Supplementary Table 2.** Data Set for Three-Dimensional Anteversion

| No. of trials | Planning value (°) | With surgical navigation |           | Without surgical navigation |           |
|---------------|--------------------|--------------------------|-----------|-----------------------------|-----------|
|               |                    | Measured value (°)       | Error (°) | Measured value (°)          | Error (°) |
|               | A                  | B                        | B-A       | C                           | C-A       |
| 1             | 4.07               | 2.80                     | 1.27      | 2.92                        | 1.15      |
| 2             | 4.07               | 3.71                     | 0.36      | 3.81                        | 0.26      |
| 3             | 4.07               | 3.50                     | 0.57      | 10.99                       | 6.92      |
| 4             | 4.07               | 2.25                     | 1.82      | 4.61                        | 0.54      |
| 5             | 4.07               | 3.19                     | 0.88      | 1.44                        | 2.63      |
| 6             | 4.07               | 1.36                     | 2.71      | 1.70                        | 2.37      |
| 7             | 4.07               | 1.67                     | 2.40      | 0.72                        | 3.35      |
| 8             | 4.07               | 1.15                     | 2.92      | 8.26                        | 4.19      |
| 9             | 4.07               | 4.22                     | 0.15      | 13.83                       | 9.76      |
| 10            | 4.07               | 3.04                     | 1.03      | 2.33                        | 1.74      |
| 11            | 4.07               | 2.84                     | 1.23      | 5.42                        | 1.35      |
| 12            | 4.07               | 3.00                     | 1.07      | 0.29                        | 3.78      |
| 13            | 4.07               | 5.15                     | 1.08      | 7.17                        | 3.10      |
| 14            | 4.07               | 4.85                     | 0.78      | 7.44                        | 3.37      |
| 15            | 4.07               | 4.15                     | 0.08      | 7.24                        | 3.17      |
| 16            | 4.07               | 4.09                     | 0.02      | 4.80                        | 0.73      |
| 17            | 4.07               | 3.59                     | 0.48      | 4.83                        | 0.76      |
| 18            | 4.07               | 3.59                     | 0.48      | 15.62                       | 11.55     |
| 19            | 4.07               | 5.79                     | 1.72      | 7.88                        | 3.81      |
| 20            | 4.07               | 5.57                     | 1.50      | 4.04                        | 0.03      |
| 21            | 4.07               | 1.89                     | 2.18      | 5.62                        | 1.55      |
| 22            | 4.07               | 2.39                     | 1.68      | 9.20                        | 5.13      |
| 23            | 4.07               | 2.23                     | 1.84      | 3.59                        | 0.48      |
| 24            | 4.07               | 5.20                     | 1.13      | 13.90                       | 9.83      |
| 25            | 4.07               | 3.95                     | 0.12      | 0.54                        | 3.53      |
| 26            | 4.07               | 5.45                     | 1.38      | 7.62                        | 3.55      |
| 27            | 4.07               | 3.68                     | 0.39      | 1.89                        | 2.18      |
| 28            | 4.07               | 1.33                     | 2.74      | 5.48                        | 1.41      |
| 29            | 4.07               | 4.09                     | 0.02      | 4.81                        | 0.74      |
| 30            | 4.07               | 3.46                     | 0.61      | 10.24                       | 6.17      |
