# Supplementary material for: CT-based Navigation System Using a Patient-Specific Instrument for Femoral Component Positioning: An Experimental in vitro Study with a Sawbone Model
Source: PubMed Central journal article supplement — Yonsei Med J. 2018 Jul 4;59(6):769–80. doi: 10.3349/ymj.2018.59.6.769 (PMC6037596; doi:10.3349/ymj.2018.59.6.769), 2018-07-04
Supplement: ymj-59-769-s004.pdf [file ymj-59-769-s004.pdf]

**Supplementary Table 3.** Data Set for  $\theta_1$ 

| No. of trials | Planning value (°) | With patient specific instrument |           | Without patient specific instrument |           |
|---------------|--------------------|----------------------------------|-----------|-------------------------------------|-----------|
|               |                    | Measured value (°)               | Error (°) | Measured value (°)                  | Error (°) |
|               | A                  | B                                | B-A       | C                                   | C-A       |
| 1             | 45.00              | 46.52                            | 1.52      | 44.42                               | 0.58      |
| 2             | 45.00              | 45.18                            | 0.18      | 43.11                               | 1.89      |
| 3             | 45.00              | 45.18                            | 0.18      | 43.11                               | 1.89      |
| 4             | 45.00              | 40.98                            | 4.02      | 48.06                               | 3.06      |
| 5             | 45.00              | 42.34                            | 2.66      | 40.32                               | 4.68      |
| 6             | 45.00              | 43.72                            | 1.28      | 41.26                               | 3.74      |
| 7             | 45.00              | 46.52                            | 1.52      | 44.50                               | 0.50      |
| 8             | 45.00              | 45.18                            | 0.18      | 43.11                               | 1.89      |
| 9             | 45.00              | 43.72                            | 1.28      | 43.11                               | 1.89      |
| 10            | 45.00              | 41.94                            | 3.06      | 49.36                               | 4.36      |
| 11            | 45.00              | 40.98                            | 4.02      | 44.06                               | 0.94      |
| 12            | 45.00              | 46.52                            | 1.52      | 45.48                               | 0.48      |
| 13            | 45.00              | 43.72                            | 1.28      | 41.15                               | 3.85      |
| 14            | 45.00              | 46.52                            | 1.52      | 44.06                               | 0.94      |
| 15            | 45.00              | 51.81                            | 6.81      | 50.32                               | 5.32      |
| 16            | 45.00              | 46.52                            | 1.52      | 48.13                               | 3.13      |
| 17            | 45.00              | 47.02                            | 2.02      | 42.00                               | 3.00      |
| 18            | 45.00              | 43.72                            | 1.28      | 38.98                               | 6.02      |
| 19            | 45.00              | 46.49                            | 1.49      | 49.07                               | 4.07      |
| 20            | 45.00              | 46.81                            | 1.81      | 44.06                               | 0.94      |
| 21            | 45.00              | 50.15                            | 5.15      | 38.98                               | 6.02      |
| 22            | 45.00              | 41.04                            | 3.96      | 42.00                               | 3.00      |
| 23            | 45.00              | 46.52                            | 1.52      | 46.45                               | 1.45      |
| 24            | 45.00              | 46.45                            | 1.45      | 38.98                               | 6.02      |
| 25            | 45.00              | 43.72                            | 1.28      | 56.38                               | 11.38     |
| 26            | 45.00              | 43.72                            | 1.28      | 44.06                               | 0.94      |
| 27            | 45.00              | 46.45                            | 1.45      | 46.45                               | 1.45      |
| 28            | 45.00              | 43.72                            | 1.28      | 44.06                               | 0.94      |
| 29            | 45.00              | 43.72                            | 1.28      | 35.18                               | 9.82      |
| 30            | 45.00              | 46.09                            | 1.09      | 44.06                               | 0.94      |
