# Supplementary material for: CT-based Navigation System Using a Patient-Specific Instrument for Femoral Component Positioning: An Experimental in vitro Study with a Sawbone Model
Source: PubMed Central journal article supplement — Yonsei Med J. 2018 Jul 4;59(6):769–80. doi: 10.3349/ymj.2018.59.6.769 (PMC6037596; doi:10.3349/ymj.2018.59.6.769), 2018-07-04
Supplement: ymj-59-769-s005.pdf [file ymj-59-769-s005.pdf]

**Supplementary Table 4.** Data Set for  $\theta_2$

| No. of trials | Planning value (°) | With patient specific instrument |           | Without patient specific instrument |           |
|---------------|--------------------|----------------------------------|-----------|-------------------------------------|-----------|
|               |                    | Measured value (°)               | Error (°) | Measured value (°)                  | Error (°) |
|               | A                  | B                                | B-A       | C                                   | C-A       |
| 1             | 135.00             | 134.41                           | 0.59      | 136.33                              | 1.33      |
| 2             | 135.00             | 139.59                           | 4.59      | 134.21                              | 0.79      |
| 3             | 135.00             | 141.38                           | 6.38      | 134.21                              | 0.79      |
| 4             | 135.00             | 133.38                           | 1.62      | 138.06                              | 3.06      |
| 5             | 135.00             | 136.21                           | 1.21      | 136.02                              | 1.02      |
| 6             | 135.00             | 135.07                           | 0.07      | 136.34                              | 1.34      |
| 7             | 135.00             | 133.29                           | 1.71      | 135.61                              | 0.61      |
| 8             | 135.00             | 137.59                           | 2.59      | 130.49                              | 4.51      |
| 9             | 135.00             | 135.07                           | 0.07      | 134.21                              | 0.79      |
| 10            | 135.00             | 136.34                           | 1.34      | 145.97                              | 10.97     |
| 11            | 135.00             | 133.38                           | 1.62      | 134.06                              | 0.94      |
| 12            | 135.00             | 140.44                           | 5.44      | 139.24                              | 4.24      |
| 13            | 135.00             | 133.72                           | 1.28      | 132.87                              | 2.13      |
| 14            | 135.00             | 141.63                           | 6.63      | 132.95                              | 2.05      |
| 15            | 135.00             | 140.38                           | 5.38      | 139.21                              | 4.21      |
| 16            | 135.00             | 139.94                           | 4.94      | 134.75                              | 0.25      |
| 17            | 135.00             | 139.63                           | 4.63      | 137.90                              | 2.90      |
| 18            | 135.00             | 136.33                           | 1.33      | 138.98                              | 3.98      |
| 19            | 135.00             | 141.60                           | 6.60      | 142.83                              | 7.83      |
| 20            | 135.00             | 135.95                           | 0.95      | 137.82                              | 2.82      |
| 21            | 135.00             | 140.15                           | 5.15      | 127.87                              | 7.13      |
| 22            | 135.00             | 133.45                           | 1.55      | 135.77                              | 0.77      |
| 23            | 135.00             | 138.93                           | 3.93      | 140.21                              | 5.21      |
| 24            | 135.00             | 138.86                           | 3.86      | 119.87                              | 15.13     |
| 25            | 135.00             | 138.13                           | 3.13      | 152.27                              | 17.27     |
| 26            | 135.00             | 136.12                           | 1.12      | 141.80                              | 6.80      |
| 27            | 135.00             | 140.87                           | 5.87      | 138.50                              | 3.50      |
| 28            | 135.00             | 137.66                           | 2.66      | 139.81                              | 4.81      |
| 29            | 135.00             | 133.72                           | 1.28      | 128.94                              | 6.06      |
| 30            | 135.00             | 134.57                           | 0.43      | 130.33                              | 4.67      |
