# Supplementary material for: CT-based Navigation System Using a Patient-Specific Instrument for Femoral Component Positioning: An Experimental in vitro Study with a Sawbone Model
Source: PubMed Central journal article supplement — Yonsei Med J. 2018 Jul 4;59(6):769–80. doi: 10.3349/ymj.2018.59.6.769 (PMC6037596; doi:10.3349/ymj.2018.59.6.769), 2018-07-04
Supplement: ymj-59-769-s006.pdf [file ymj-59-769-s006.pdf]

**Supplementary Table 5.** Data Set for  $\theta_3$

| No. of trials | Planning value (°) | With patient specific instrument |           | Without patient specific instrument |           |
|---------------|--------------------|----------------------------------|-----------|-------------------------------------|-----------|
|               |                    | Measured value (°)               | Error (°) | Measured value (°)                  | Error (°) |
|               | A                  | B                                | B-A       | C                                   | C-A       |
| 1             | 0.00               | 7.93                             | 7.93      | 3.54                                | 3.54      |
| 2             | 0.00               | 2.92                             | 2.92      | 0.76                                | 0.76      |
| 3             | 0.00               | 1.15                             | 1.15      | 3.89                                | 3.89      |
| 4             | 0.00               | 8.58                             | 8.58      | 5.17                                | 5.17      |
| 5             | 0.00               | 3.60                             | 3.60      | 3.81                                | 3.81      |
| 6             | 0.00               | 5.40                             | 5.40      | 1.17                                | 1.17      |
| 7             | 0.00               | 8.14                             | 8.14      | 5.61                                | 5.61      |
| 8             | 0.00               | 6.43                             | 6.43      | 4.53                                | 4.53      |
| 9             | 0.00               | 4.96                             | 4.96      | 0.35                                | 0.35      |
| 10            | 0.00               | 3.53                             | 3.53      | 5.20                                | 5.20      |
| 11            | 0.00               | 1.80                             | 1.80      | 5.70                                | 5.70      |
| 12            | 0.00               | 4.85                             | 4.85      | 3.22                                | 3.22      |
| 13            | 0.00               | 3.29                             | 3.29      | 2.70                                | 2.70      |
| 14            | 0.00               | 2.39                             | 2.39      | 3.50                                | 3.50      |
| 15            | 0.00               | 10.40                            | 10.40     | 6.60                                | 6.60      |
| 16            | 0.00               | 5.90                             | 5.90      | 7.75                                | 7.75      |
| 17            | 0.00               | 5.47                             | 5.47      | 9.64                                | 9.64      |
| 18            | 0.00               | 4.32                             | 4.32      | 6.88                                | 6.88      |
| 19            | 0.00               | 1.96                             | 1.96      | 5.16                                | 5.16      |
| 20            | 0.00               | 8.24                             | 8.24      | 3.10                                | 3.10      |
| 21            | 0.00               | 11.59                            | 11.59     | 5.34                                | 5.34      |
| 22            | 0.00               | 5.38                             | 5.38      | 3.01                                | 3.01      |
| 23            | 0.00               | 3.52                             | 3.52      | 2.03                                | 2.03      |
| 24            | 0.00               | 4.04                             | 4.04      | 5.35                                | 5.35      |
| 25            | 0.00               | 1.44                             | 1.44      | 13.52                               | 13.52     |
| 26            | 0.00               | 6.55                             | 6.55      | 3.20                                | 3.20      |
| 27            | 0.00               | 5.23                             | 5.23      | 3.33                                | 3.33      |
| 28            | 0.00               | 5.61                             | 5.61      | 0.68                                | 0.68      |
| 29            | 0.00               | 9.33                             | 9.33      | 6.68                                | 6.68      |
| 30            | 0.00               | 4.70                             | 4.70      | 1.33                                | 1.33      |
