# Supplementary material for: CT-based Navigation System Using a Patient-Specific Instrument for Femoral Component Positioning: An Experimental in vitro Study with a Sawbone Model
Source: PubMed Central journal article supplement — Yonsei Med J. 2018 Jul 4;59(6):769–80. doi: 10.3349/ymj.2018.59.6.769 (PMC6037596; doi:10.3349/ymj.2018.59.6.769), 2018-07-04
Supplement: ymj-59-769-s007.pdf [file ymj-59-769-s007.pdf]

**Supplementary Table 6.** Data Set for *d*

| No. of trials | Planning value (mm) | With patient specific instrument |            | Without patient specific instrument |            |
|---------------|---------------------|----------------------------------|------------|-------------------------------------|------------|
|               |                     | Measured value (mm)              | Error (mm) | Measured value (mm)                 | Error (mm) |
|               | A                   | B                                | B-A        | C                                   | C-A        |
| 1             | 10.00               | 9.40                             | 0.72       | 15.20                               | 5.08       |
| 2             | 10.00               | 9.76                             | 0.36       | 11.45                               | 1.33       |
| 3             | 10.00               | 8.85                             | 1.27       | 12.99                               | 2.87       |
| 4             | 10.00               | 10.49                            | 0.37       | 12.11                               | 1.99       |
| 5             | 10.00               | 10.23                            | 0.11       | 14.98                               | 4.86       |
| 6             | 10.00               | 10.31                            | 0.19       | 12.33                               | 2.21       |
| 7             | 10.00               | 9.40                             | 0.72       | 15.20                               | 5.08       |
| 8             | 10.00               | 11.04                            | 0.92       | 13.88                               | 3.76       |
| 9             | 10.00               | 9.94                             | 0.18       | 13.88                               | 3.76       |
| 10            | 10.00               | 8.85                             | 1.27       | 14.10                               | 3.98       |
| 11            | 10.00               | 10.31                            | 0.19       | 13.66                               | 3.54       |
| 12            | 10.00               | 10.67                            | 0.55       | 13.88                               | 3.76       |
| 13            | 10.00               | 10.13                            | 0.01       | 12.11                               | 1.99       |
| 14            | 10.00               | 9.94                             | 0.18       | 14.10                               | 3.98       |
| 15            | 10.00               | 8.67                             | 1.45       | 11.22                               | 1.10       |
| 16            | 10.00               | 10.13                            | 0.01       | 12.55                               | 2.43       |
| 17            | 10.00               | 9.58                             | 0.54       | 12.77                               | 2.65       |
| 18            | 10.00               | 10.49                            | 0.37       | 11.89                               | 1.77       |
| 19            | 10.00               | 9.03                             | 1.09       | 12.55                               | 2.43       |
| 20            | 10.00               | 10.13                            | 0.01       | 14.54                               | 4.42       |
| 21            | 10.00               | 9.21                             | 0.91       | 14.32                               | 4.20       |
| 22            | 10.00               | 9.94                             | 0.18       | 13.21                               | 3.09       |
| 23            | 10.00               | 10.31                            | 0.19       | 12.33                               | 2.21       |
| 24            | 10.00               | 9.76                             | 0.36       | 13.66                               | 3.54       |
| 25            | 10.00               | 10.31                            | 0.19       | 8.58                                | 1.54       |
| 26            | 10.00               | 10.49                            | 0.37       | 13.88                               | 3.76       |
| 27            | 10.00               | 9.58                             | 0.54       | 10.74                               | 0.62       |
| 28            | 10.00               | 9.76                             | 0.36       | 14.54                               | 4.42       |
| 29            | 10.00               | 10.67                            | 0.55       | 13.66                               | 3.54       |
| 30            | 10.00               | 9.96                             | 0.16       | 14.76                               | 4.64       |
